# Supplementary material for: Size and morphology effects on the fluorescence properties of π-conjugated poly(p-phenylene) polyelectrolyte nanoparticles synthesized via polyion association
Source: Royal Society of Chemistry journal article supplement (doi:10.1039/c5tc03337c), 2015-12-09
Supplement: c5tc03337c1.pdf [file c5tc03337c1.pdf]

Electronic Supplementary Information (ESI) for *J. Mater. Chem. C*

**Size and morphology effects on fluorescence properties of  $\pi$ -conjugated poly(*p*-phenylene) polyelectrolyte nanoparticles synthesized via polyion association:**

Hiroshi Yao\* and Chiaki Fukui

*Graduate School of Material Science, University of Hyogo, 3-2-1 Koto, Kamigori-cho, Ako-gun, Hyogo 678-1297, Japan*

E-mail: yao@sci.u-hyogo.ac.jp

**Emission spectrum of the PPP-SO/PDDA film prepared by a drop cast of the 2-propanol solution.**

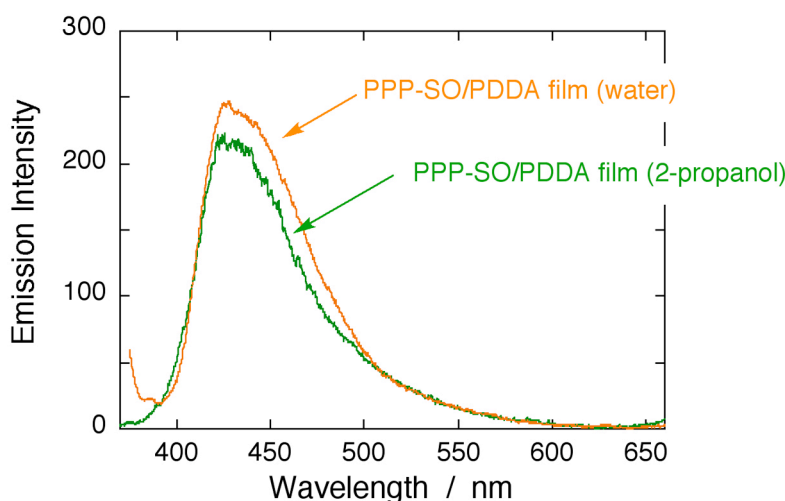

**Fig. S1.** Emission spectrum of PPP-SO/PDDA thin film prepared by a drop cast of the 2-propanol solution.

We examined the fluorescence spectrum of bulk PPP-SO/PDDA thin film prepared by a drop cast of the 2-propanol solution ( $\rho = 1$ ). The results are shown in Fig. S1. The spectral shape is quite similar to that prepared by a drop cast of the corresponding aqueous solution.
